# Supplementary material for: Low ivermectin use among 5- to 6-year-old children: observations from door-to-door surveys in onchocerciasis-endemic regions in Africa
Source: Oxford University Press journal article supplement (doi:10.1093/inthealth/ihz044), 2019-06-06
Supplement: ihz044_supplementary_material.pdf [file ihz044_supplementary_material.pdf]

**Supplementary material:** Percentage of pregnant women during recent demographic surveys in target countries

| Country     | Source of information                          | Proportion of women who are pregnant (%) | Reference                                                                                                                                                                                                                                                                                                                                                   |
|-------------|------------------------------------------------|------------------------------------------|-------------------------------------------------------------------------------------------------------------------------------------------------------------------------------------------------------------------------------------------------------------------------------------------------------------------------------------------------------------|
| Cameroon    | <b>MICS 5, 2014</b><br>(Table CH.24, page 96)  | 882/9861 (8.9%)                          | <a href="https://mics-surveys-prod.s3.amazonaws.com/MICS5/West%20and%20Central%20Africa/Cameroon/2014/Final/Cameroon%202014%20MICS_French.pdf">https://mics-surveys-prod.s3.amazonaws.com/MICS5/West%20and%20Central%20Africa/Cameroon/2014/Final/Cameroon%202014%20MICS_French.pdf</a>                                                                     |
| DRC         | <b>DHS 2013</b><br>(Tableau A-12.7, page 396)  | 2283/18827 (12.1%)                       | <a href="https://dhsprogram.com/pubs/pdf/FR300/FR300.pdf">https://dhsprogram.com/pubs/pdf/FR300/FR300.pdf</a>                                                                                                                                                                                                                                               |
| Nigeria     | <b>MICS 5, 2016</b><br>(Table CH.24, page 105) | 3724/34376 (10.8%)                       | <a href="https://mics-surveys-prod.s3.amazonaws.com/MICS5/West%20and%20Central%20Africa/Nigeria/2016-2017/Final/Nigeria%202016-17%20MICS_English.zip">https://mics-surveys-prod.s3.amazonaws.com/MICS5/West%20and%20Central%20Africa/Nigeria/2016-2017/Final/Nigeria%202016-17%20MICS_English.zip</a>                                                       |
| South Sudan | <b>MICS 4, 2010</b><br>(Table CH.13, page 70)  | 1740/9069 (19.2%)*                       | <a href="https://mics-surveys-prod.s3.amazonaws.com/MICS4/Eastern%20and%20Southern%20Africa/South%20Sudan%2C%20Republic%20of/2010/Final/South%20Sudan%202010%20MICS_English.pdf">https://mics-surveys-prod.s3.amazonaws.com/MICS4/Eastern%20and%20Southern%20Africa/South%20Sudan%2C%20Republic%20of/2010/Final/South%20Sudan%202010%20MICS_English.pdf</a> |
| Tanzania    | <b>DHS 2015</b><br>(Table 12.9, page 285)      | 1122/13266 (8.5%)                        | <a href="https://dhsprogram.com/pubs/pdf/FR321/FR321.pdf">https://dhsprogram.com/pubs/pdf/FR321/FR321.pdf</a>                                                                                                                                                                                                                                               |
| Uganda      | <b>DHS 2016</b><br>(Table 12.8, page 239)      | 1858/18506 (10.0%)                       | <a href="https://dhsprogram.com/pubs/pdf/FR333/FR333.pdf">https://dhsprogram.com/pubs/pdf/FR333/FR333.pdf</a>                                                                                                                                                                                                                                               |

*\*The numerator used was: number of women who had given birth in the past two years, divided by 2*
